# Supplementary material for: Synthesis, characterization, and field-effect transistor performance of naphtho[1,2-b:5,6-b′]dithiophene-based donor–acceptor copolymers
Source: Royal Society of Chemistry journal article supplement (doi:10.1039/c3ra42584c), 2013-01-01
Supplement: c3ra42584c.pdf [file c3ra42584c.pdf]

## Electronic Supplementary Information

# Synthesis, Characterization, and Field-Effect Transistor Performance of Naphtho[1,2-b:5,6- b']dithiophene-Based Donor-Acceptor Copolymers

*Shaowei Shi<sup>1,2</sup>, Xiaodong Xie<sup>3</sup>, Rui Qu<sup>1</sup>, Song Chen<sup>4</sup>, Liwei Wang<sup>1</sup>, Meng Wang<sup>1</sup>, Haiqiao Wang<sup>1,2\*</sup>, Xiaoyu Li<sup>2\*</sup>, and Gui Yu<sup>3\*</sup>*

1. State Key Laboratory of Organic-Inorganic Composite, Beijing University of Chemical Technology, Beijing 100029, China
2. Key Laboratory of Carbon Fiber and Functional Polymers, Ministry of Education, Beijing University of Chemical Technology, Beijing 100029, China
3. CAS Key Laboratory of Organic Solids, Institute of Chemistry, Chinese Academy of Sciences, Beijing 100190, China
4. China Textile Academy, Beijing, 100025, China

\* Corresponding author: e-mail: wanghaiqiao@mail.buct.edu.cn (H. Wang); yugui@iccas.ac.cn (G. Yu); lixy@mail.buct.edu.cn (X. Li)

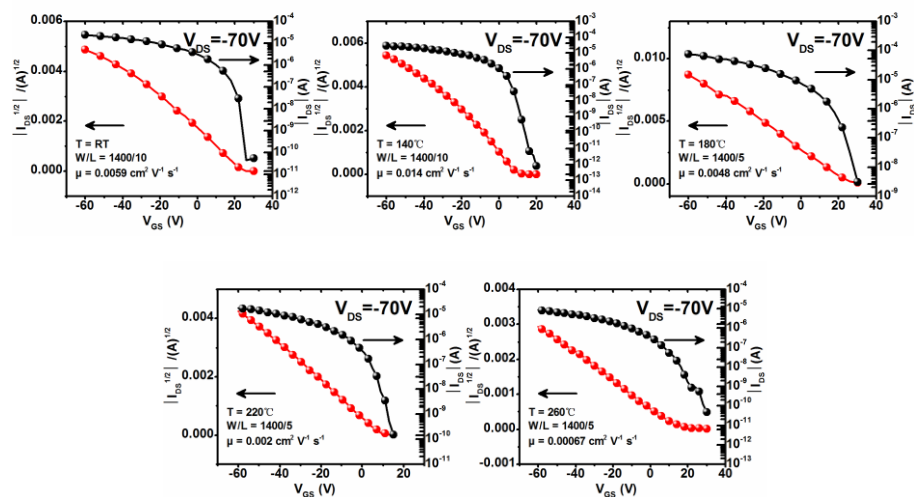

**Figure S1.** Typical transfer curves of the PzNDT-T-DPP-based OFETs with different channel length under different annealing temperature ( $T$ )

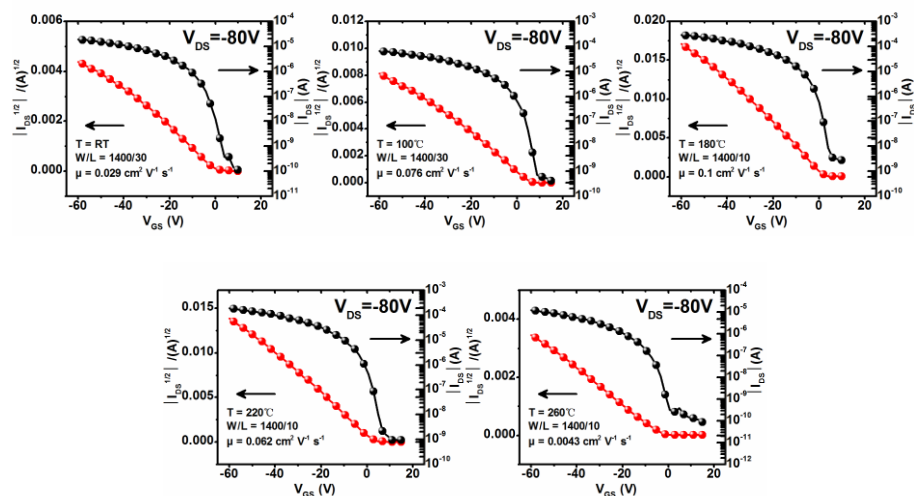

**Figure S2.** Typical transfer curves of the PzNDT-F-DPP-based OFETs with different channel length under different annealing temperature ( $T$ )

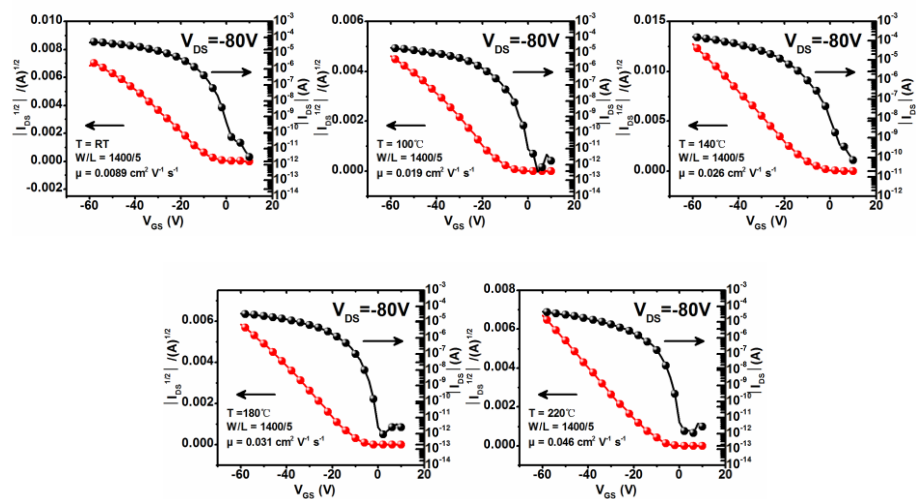

**Figure S3.** Typical transfer curves of the PzNDTTPD-based OFETs with different channel length under different annealing temperature (T)

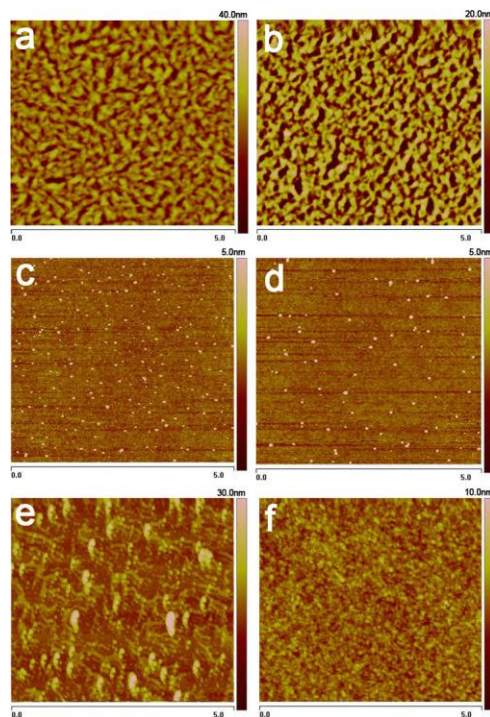

**Figure S4 .** AFM topography images ( $5 \times 5 \mu\text{m}^2$ ) of polymer films on OTS-modified  $\text{SiO}_2/\text{Si}$  substrates. The PzNDT-T-DPP thin films: a) without annealing, and b) with annealing at  $100^\circ\text{C}$ . The PzNDT-F-DPP thin films: c) without annealing, and d) with annealing at  $140^\circ\text{C}$ . The PzNDTTPD thin films: e) without annealing, and f) with annealing at  $260^\circ\text{C}$ .

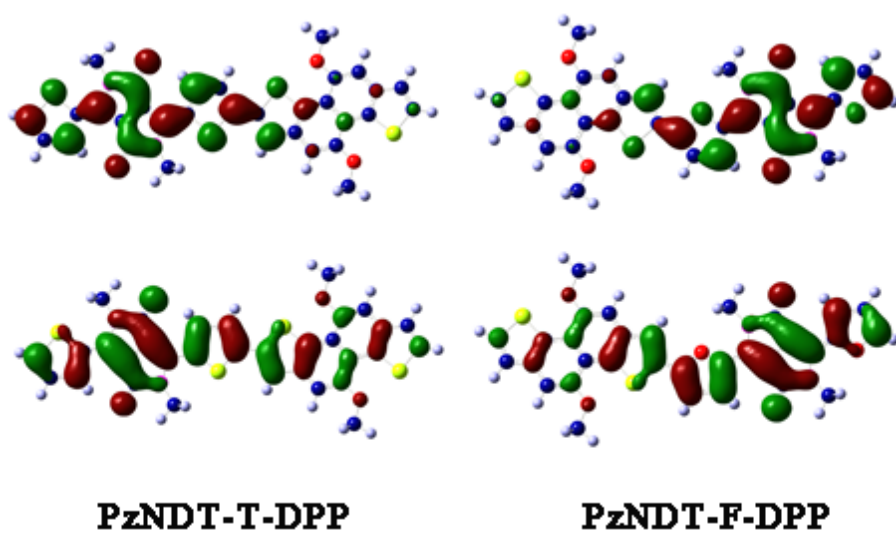

**Figure S5.** The frontier molecular orbital (LUMO, top; HOMO, bottom) obtained from density functional theory (DFT) calculations on the polymers with a chain length  $n=1$  at b3lyp/6-31g(d,p) level of theory.
